# Supplementary material
Source: publisher site journal article supplement (https://www.dovepress.com/article/301465)
Supplement: Supplementary file 1 [file get_supplementary_file.php]

Supplementary materials

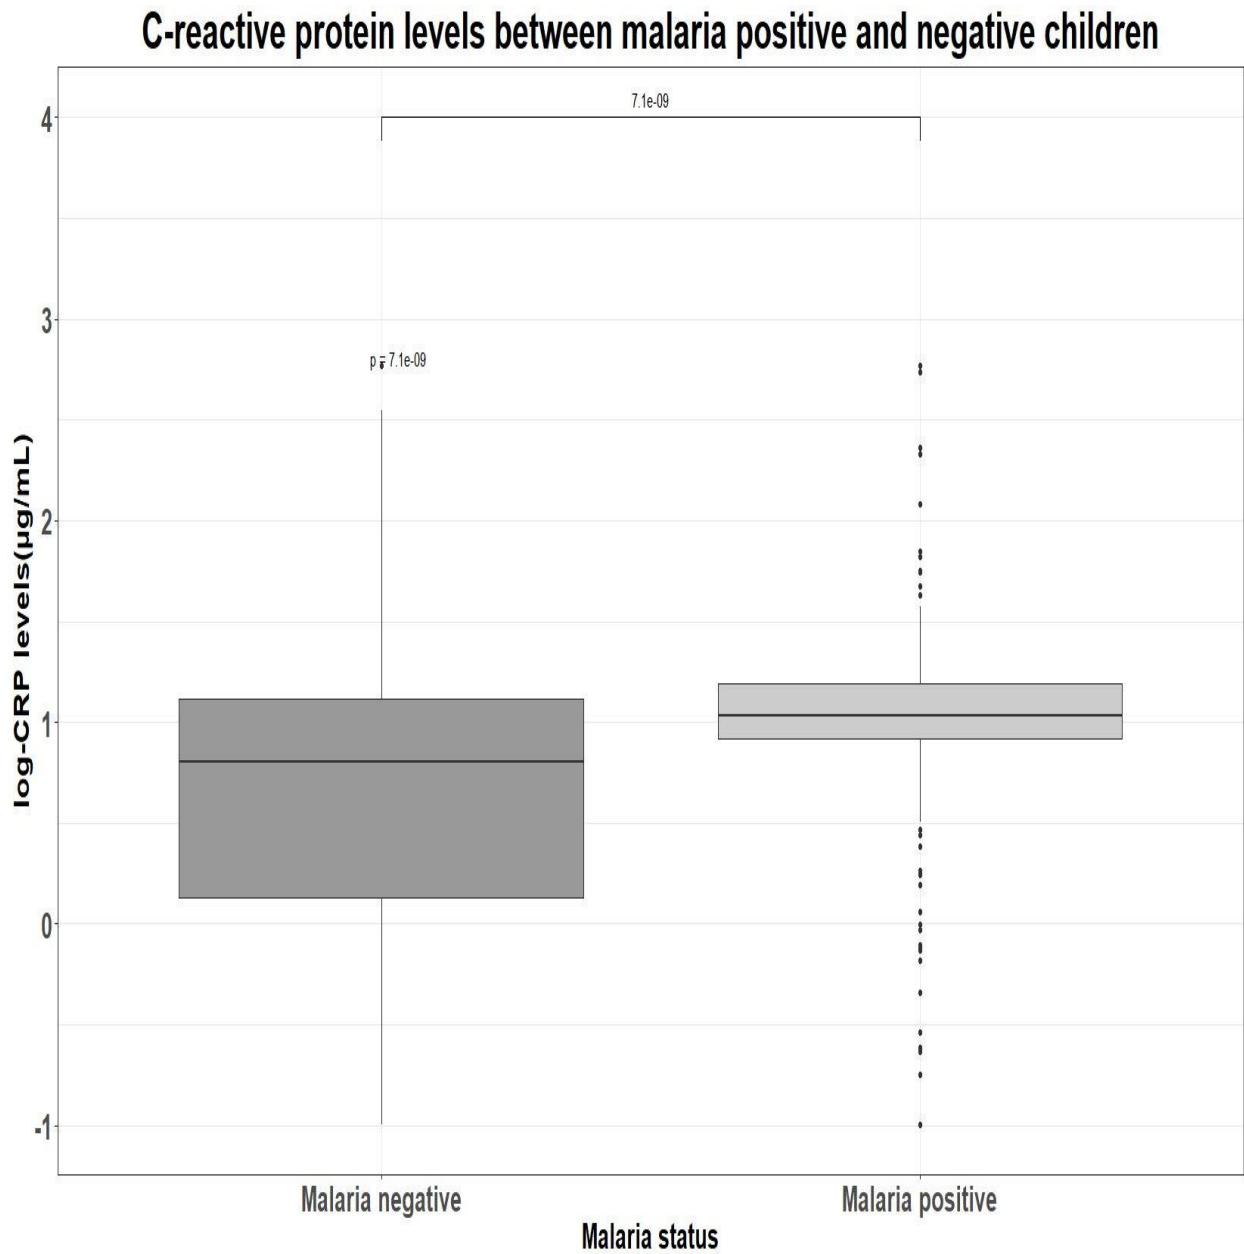

**Figure S1. C-reactive protein levels between malaria positive and negative children.** This figure compares c-reactive protein levels between malaria positive and negative children. The x-axis shows their malaria status and the y-axis is the log c-reactive protein levels (µg/mL).

## Ferritin levels between malaria positive and negative children

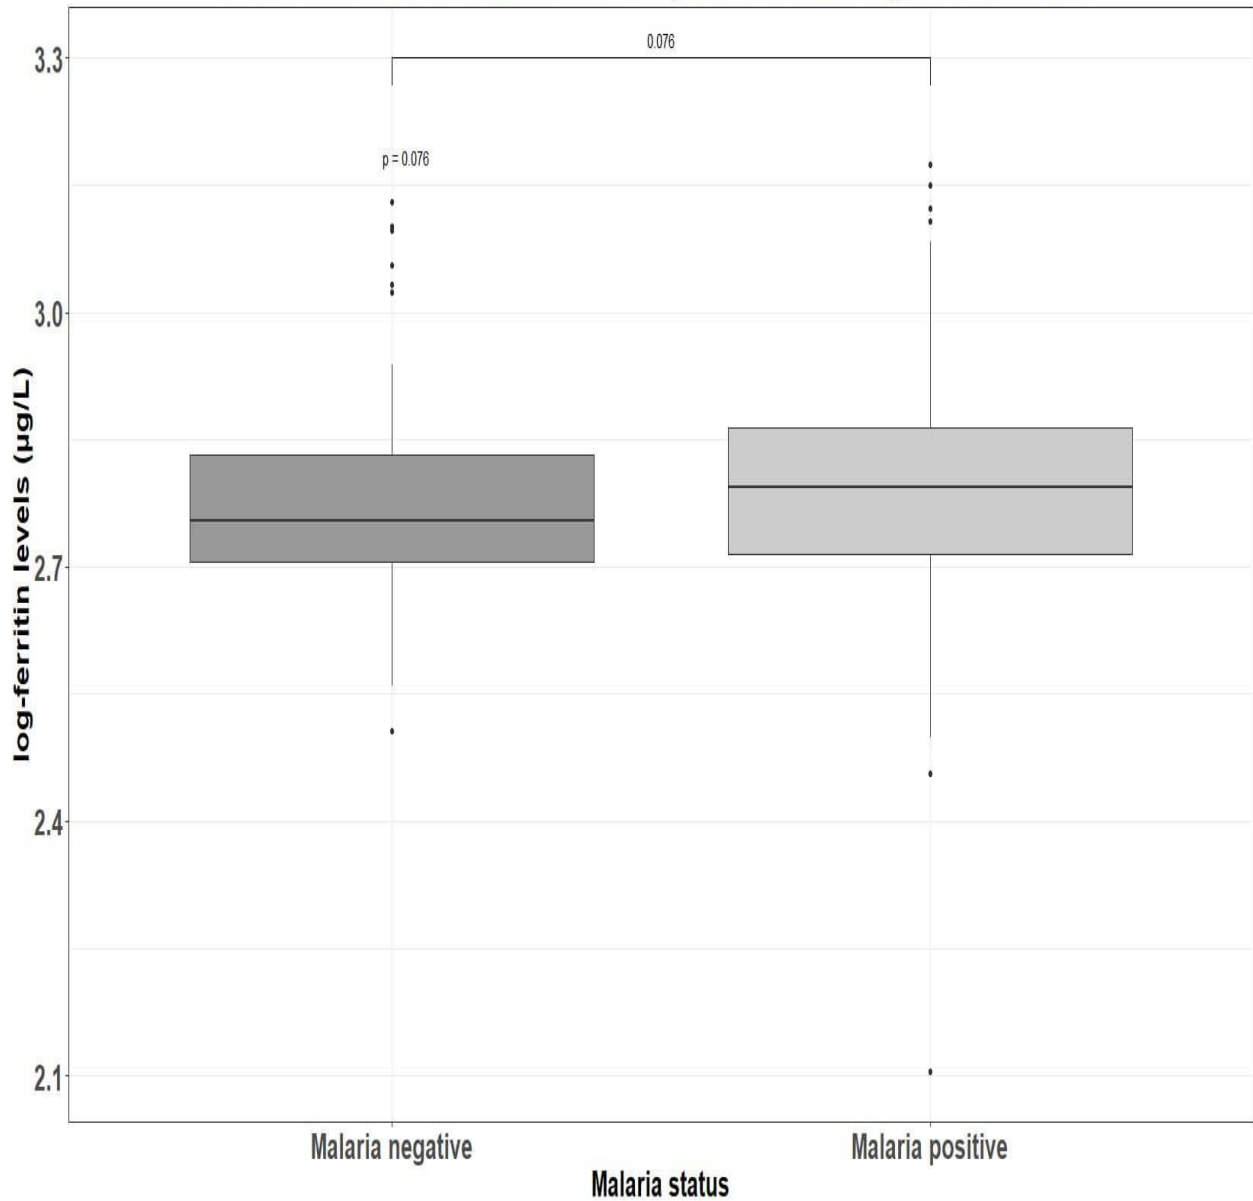

**Figure S2. Ferritin levels between malaria positive and negative children.** The figure compares ferritin levels between malaria positive and negative children. The x-axis shows malaria status and the y-axis is the log ferritin protein levels (µg/L).

## Parasite density between HbAA and HbAS Children

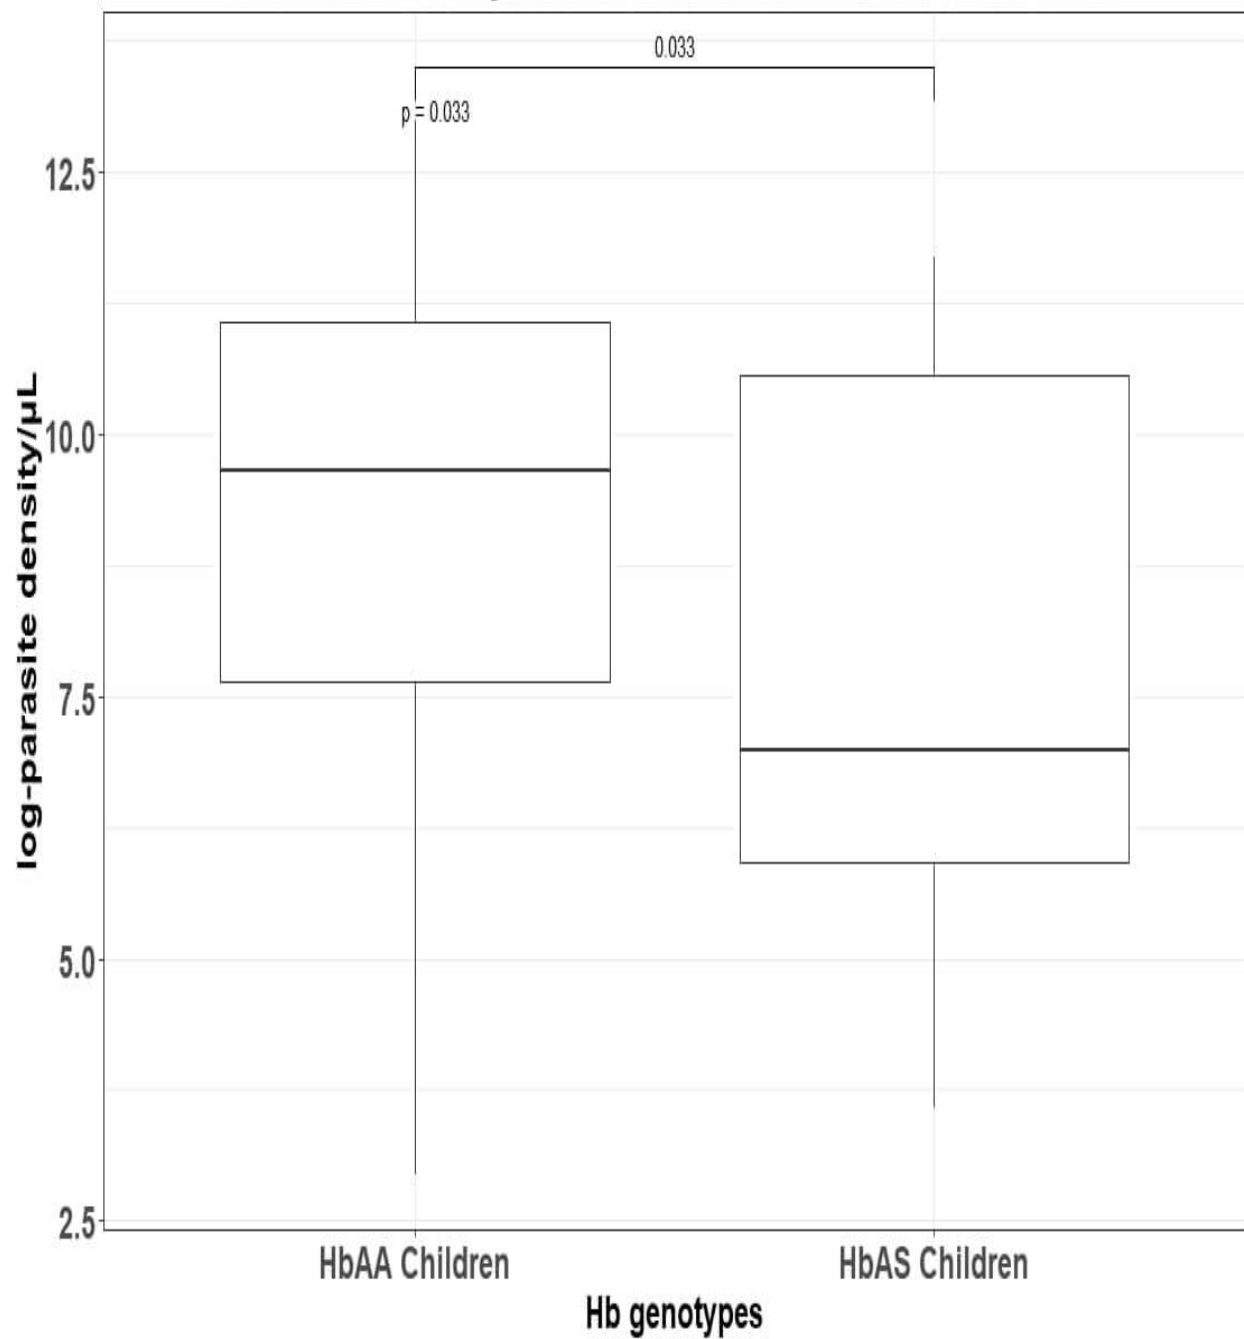

**Figure S3. Parasite density of malaria positive HbAA and HbAS children.** This figure compares parasite density of malaria positive HbAA and HbAS children. The x-axis shows their malaria status and the y-axis is the log parasite density/μL.
